# Supplementary material for: The effect of carbonyl on the isomerization of a galanthan ring system and total synthesis of (±)-β-lycorane
Source: Royal Society of Chemistry journal article supplement (doi:10.1039/d0ob02398a), 2021-01-01

# Supporting Information

## The Effect of Carbonyl on the Isomerization of Galanthan Ring System and Total Synthesis of ( $\pm$ )- $\beta$ -lycorane *via* a Double Michael Addition Approach

Leilei Liang,<sup>a†</sup> Ji Li,<sup>a†</sup> Baochun Shen,<sup>a</sup> Yili Zhang,<sup>a</sup> Jianping Liu,<sup>b</sup> Jingbo Chen,<sup>\*b</sup> Dandan Liu<sup>\*a</sup>

---

<sup>a</sup> School of Pharmaceutical Sciences and Yunnan Key Laboratory of Pharmacology for Natural Products, Kunming Medical University, Kunming, Yunnan 650500, P. R. China. E-mail: liudandan1017@qq.com

<sup>b</sup> Key Laboratory of Medicinal Chemistry for Natural Resource, Ministry of Education and Yunnan Province, Yunnan University, Kunming 650091, P. R. China. E-mail: chenjb@ynu.edu.cn

† These authors contributed equally.

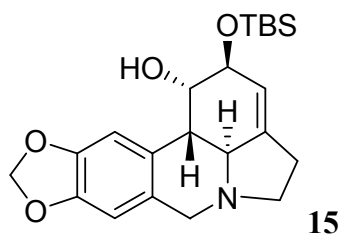

$^1\text{H}$  NMR ( $\text{CDCl}_3$ , 600 MHz),  $^{13}\text{C}$  NMR ( $\text{CDCl}_3$ , 150 MHz)

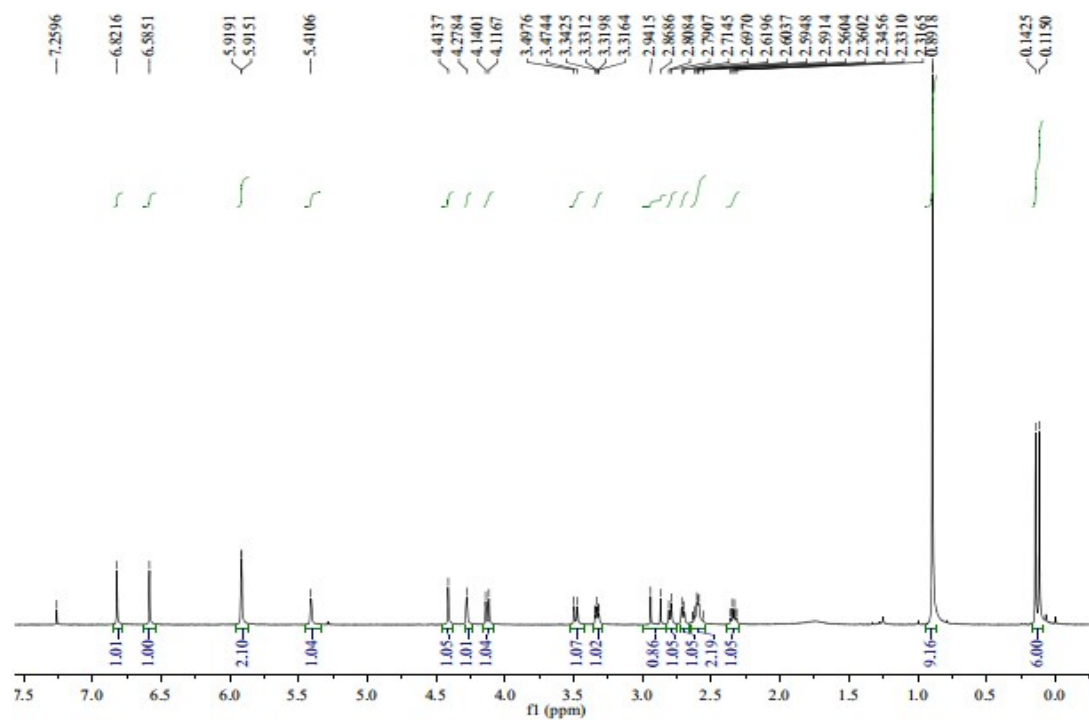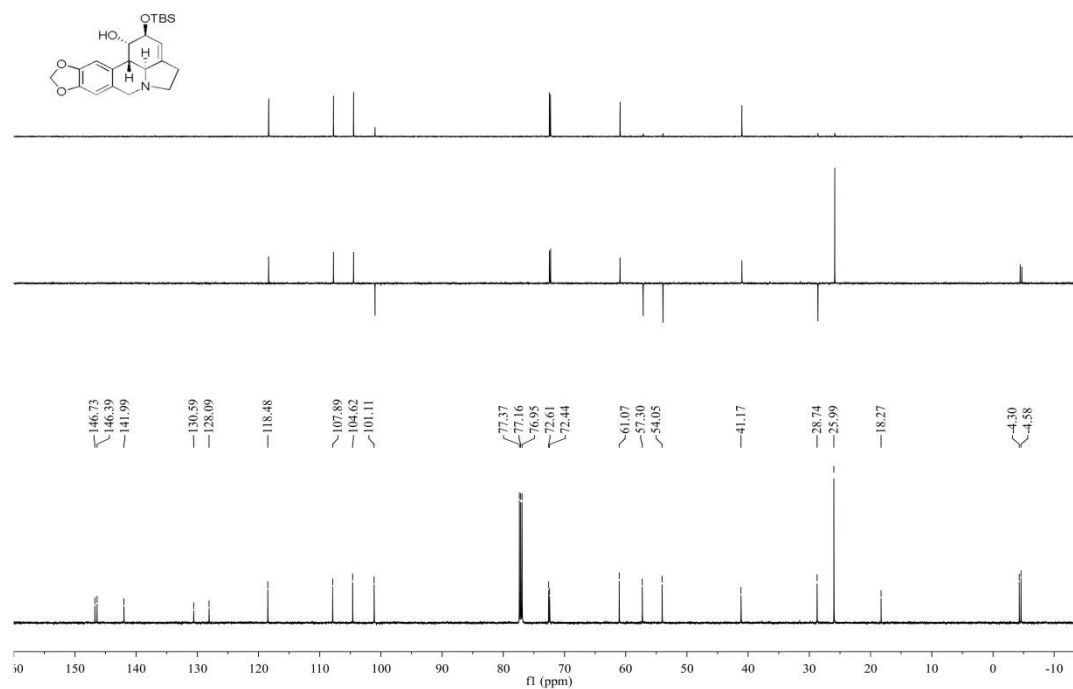

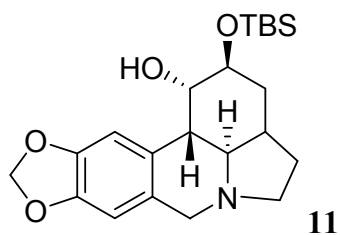

$^1\text{H}$  NMR ( $\text{CD}_3\text{OD}$ , 400 MHz),  $^{13}\text{C}$  NMR ( $\text{CD}_3\text{OD}$ , 100 MHz)

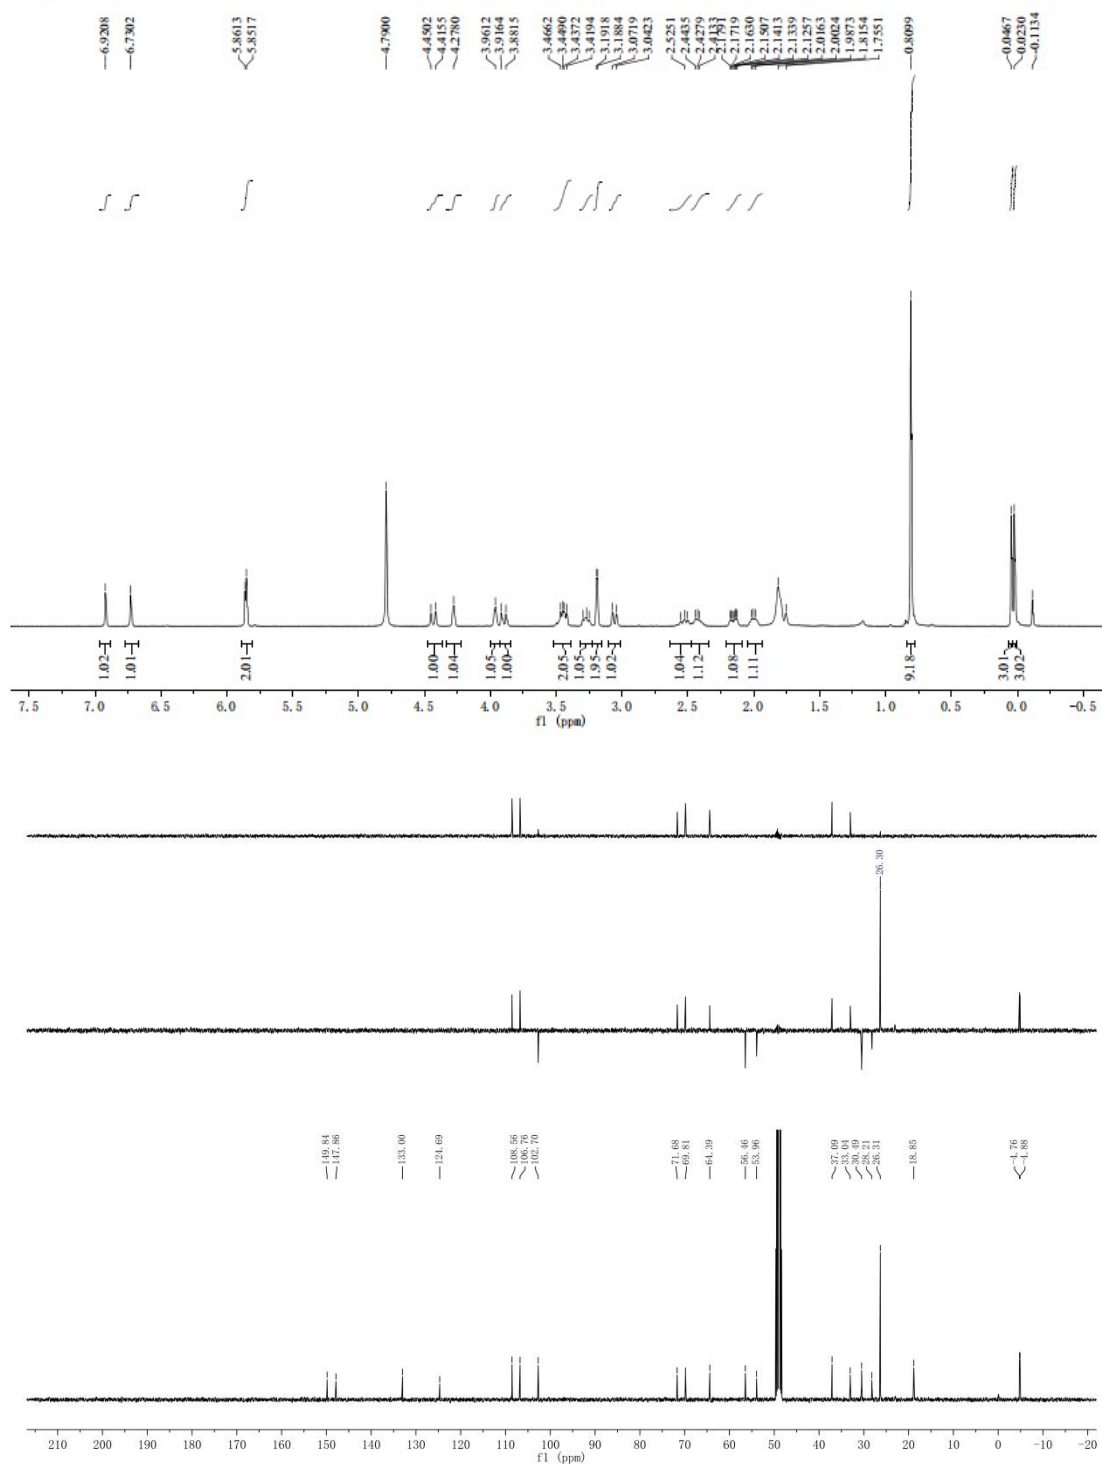

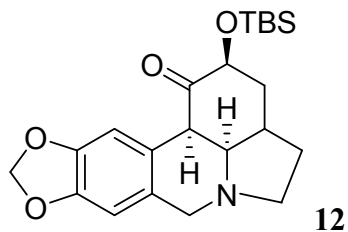

$^1\text{H}$  NMR ( $\text{CDCl}_3$ , 400 MHz),  $^{13}\text{C}$  NMR ( $\text{CDCl}_3$ , 100 MHz)

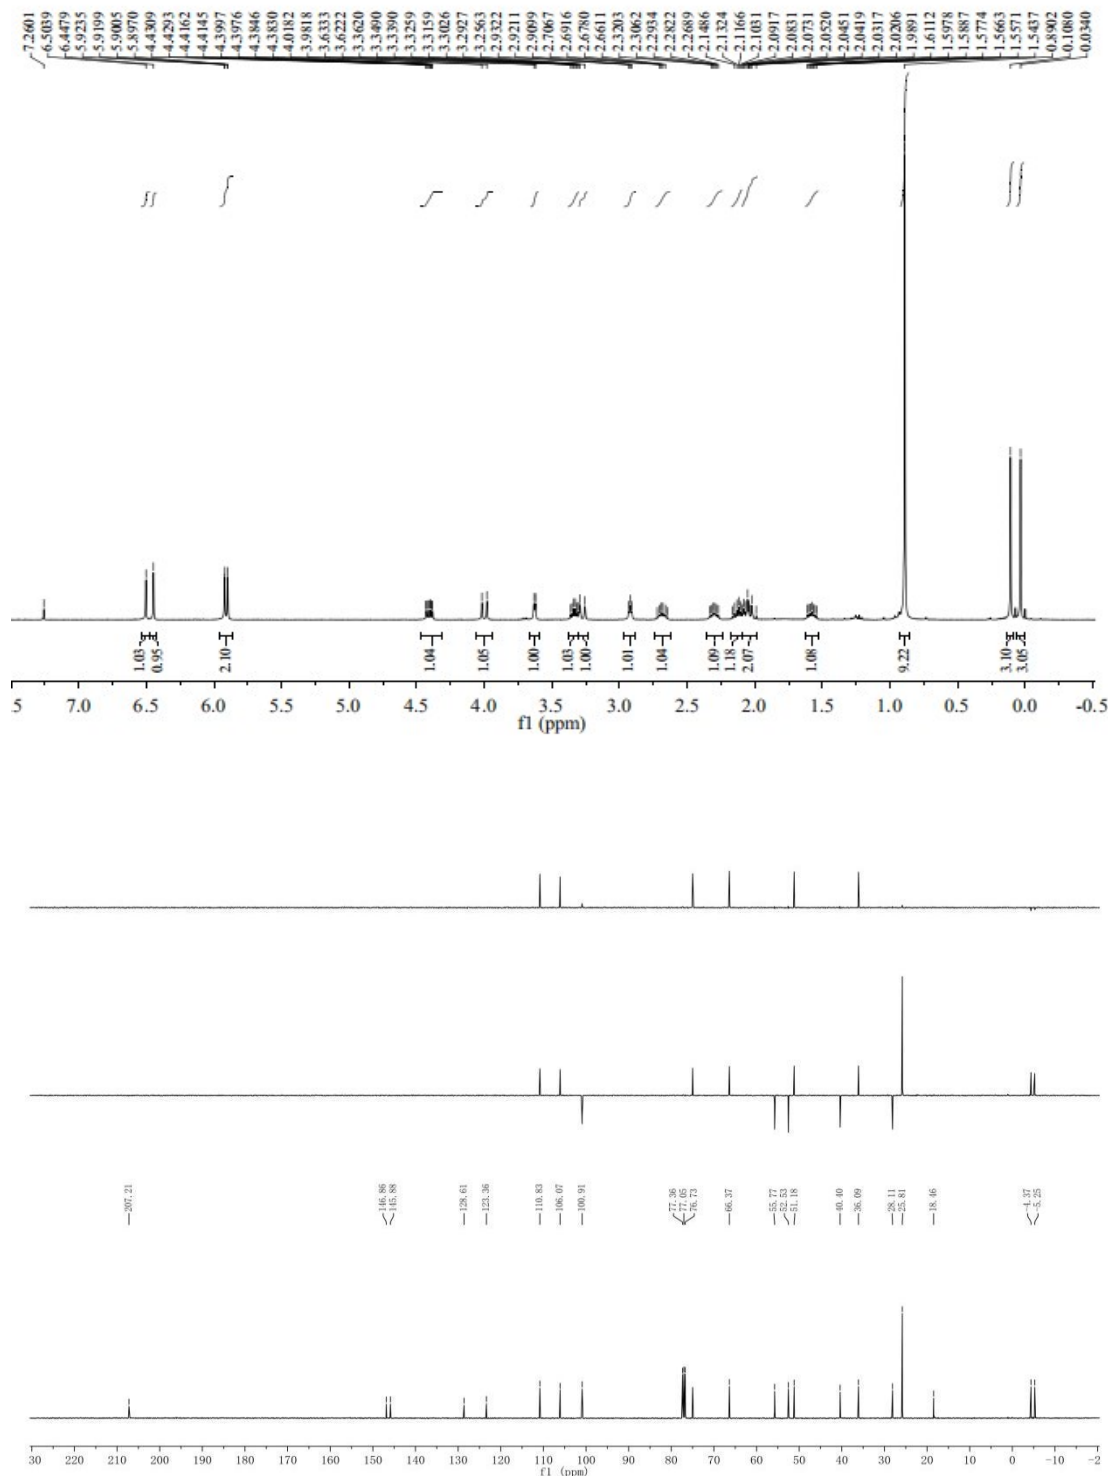

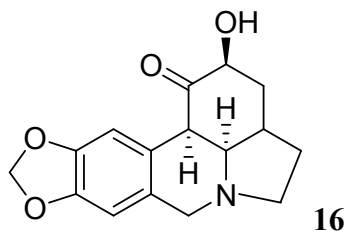

$^1\text{H}$  NMR ( $\text{CDCl}_3$ , 400 MHz) ,  $^{13}\text{C}$  NMR ( $\text{CDCl}_3$ , 100 MHz)

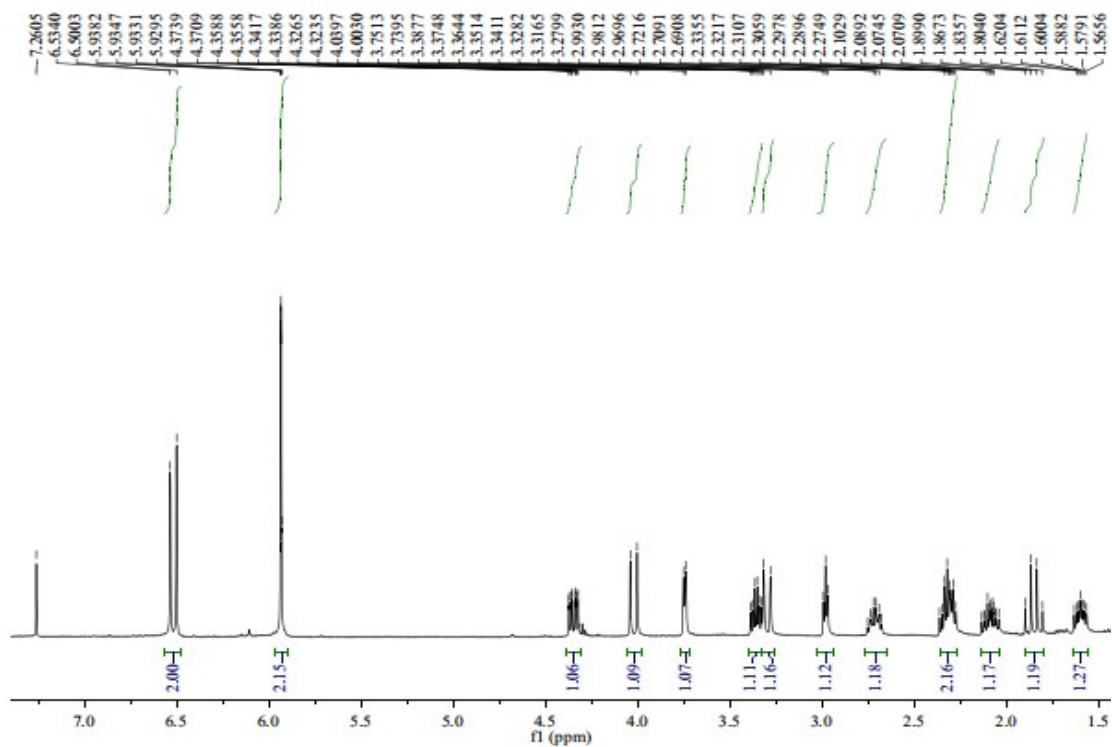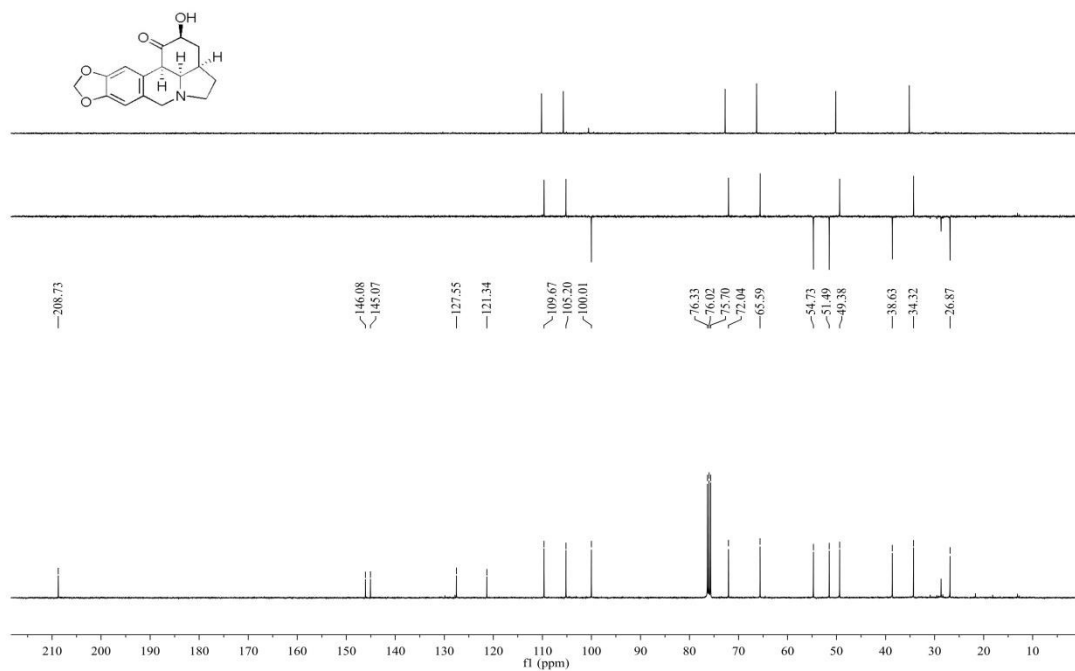

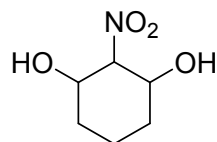

24

$^1\text{H}$  NMR ( $\text{CD}_3\text{OD}$ , 300 MHz),  $^{13}\text{C}$  NMR ( $\text{CD}_3\text{OD}$ , 75 MHz)

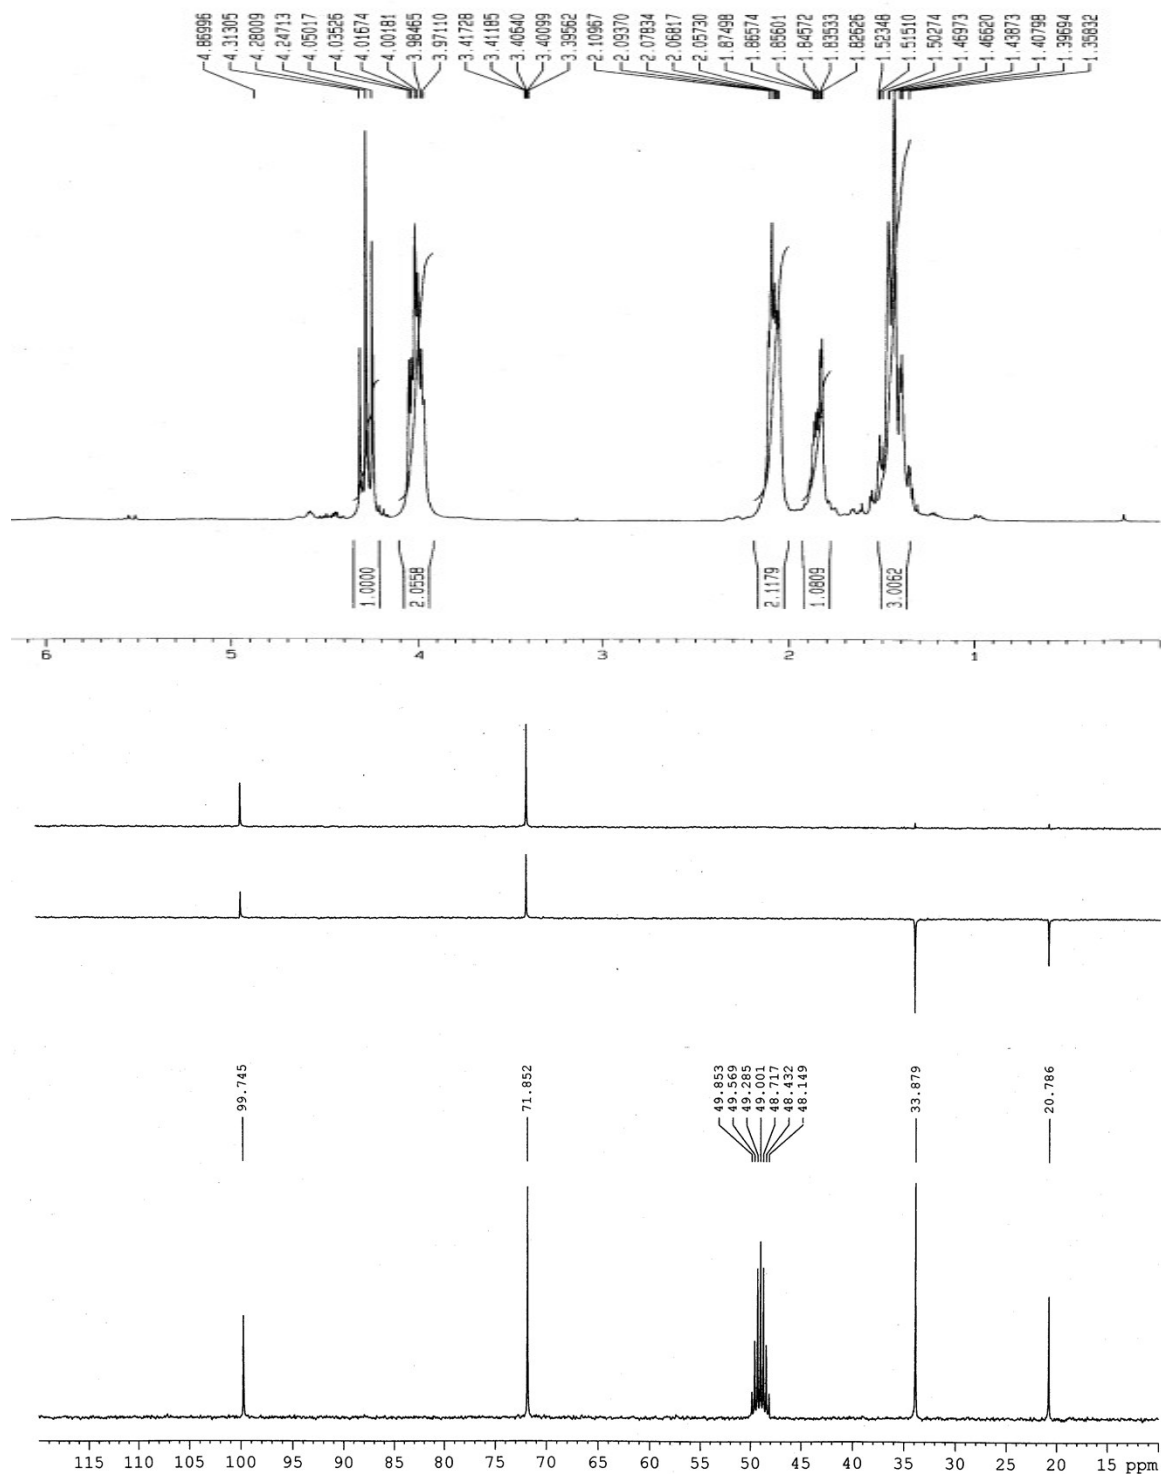

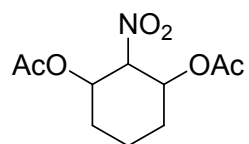

25

$^1\text{H}$  NMR ( $\text{CDCl}_3$ , 400 MHz),  $^{13}\text{C}$  NMR ( $\text{CDCl}_3$ , 100 MHz)

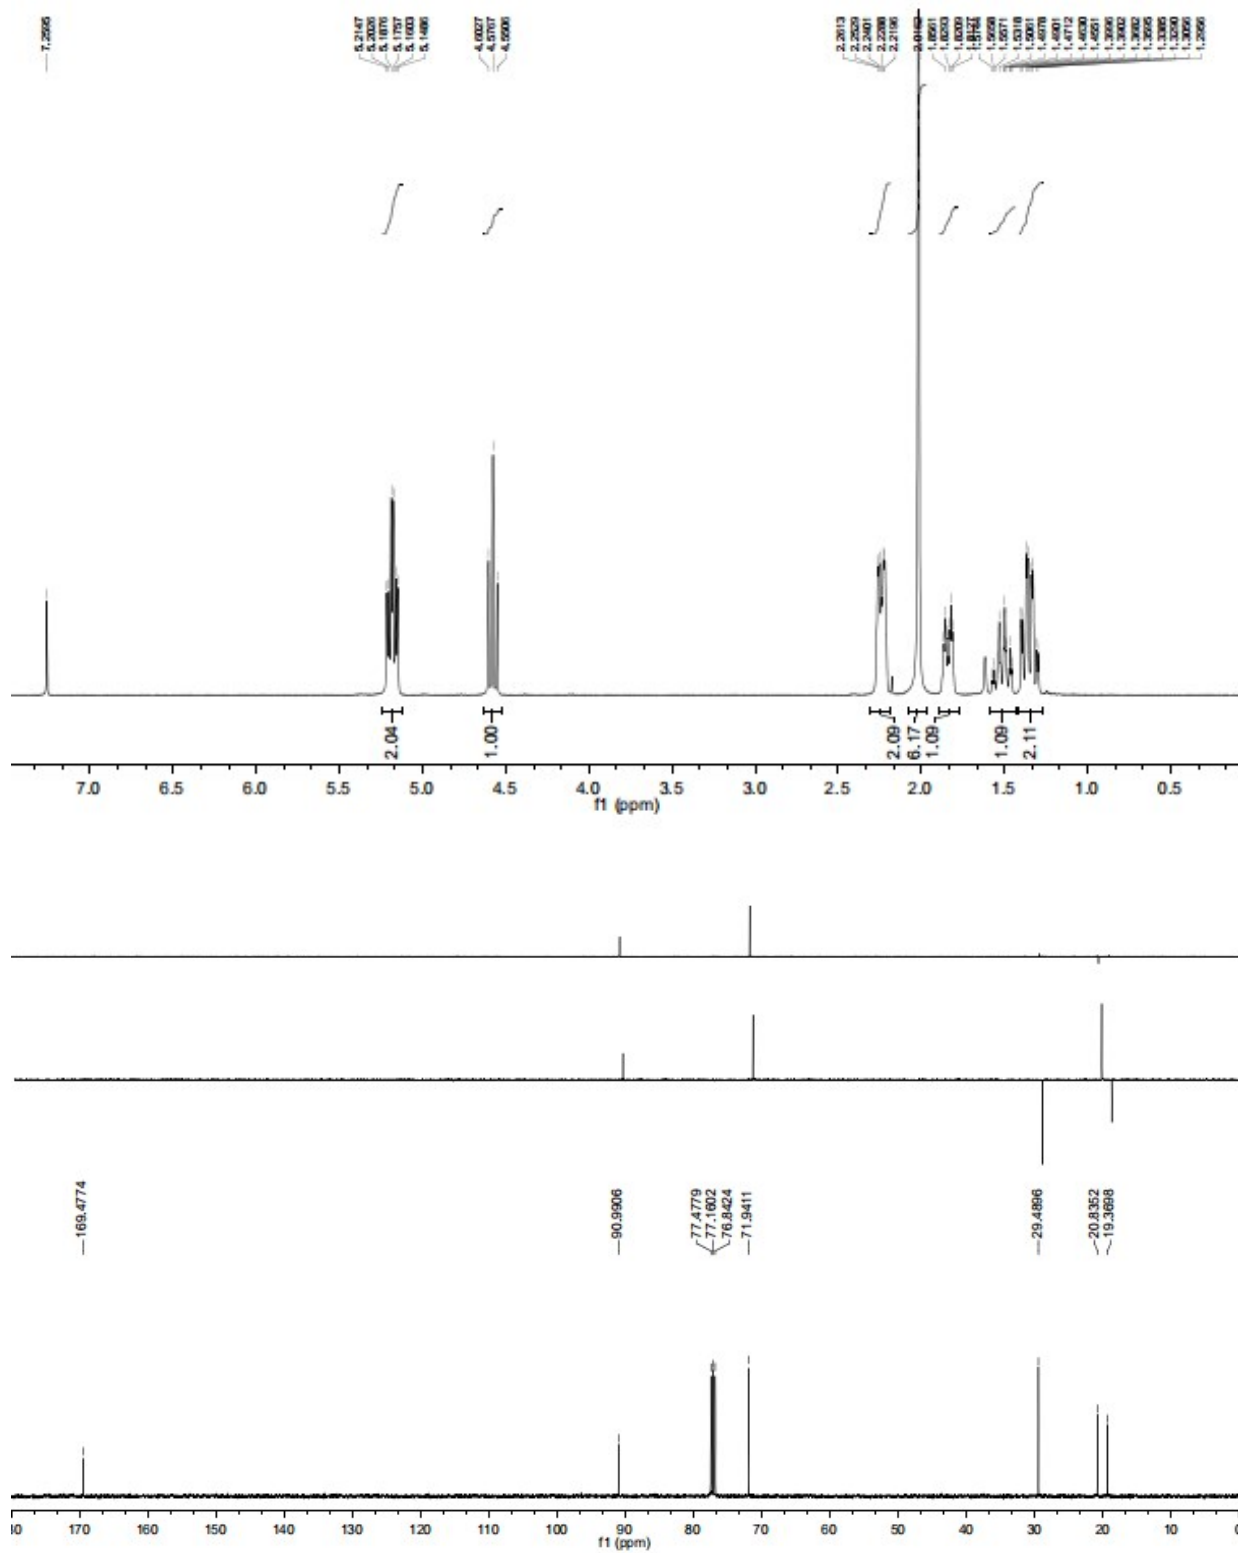

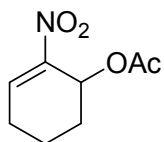

**19**

$^1\text{H}$  NMR ( $\text{CDCl}_3$ , 400 MHz),  $^{13}\text{C}$  NMR ( $\text{CDCl}_3$ , 100 MHz)

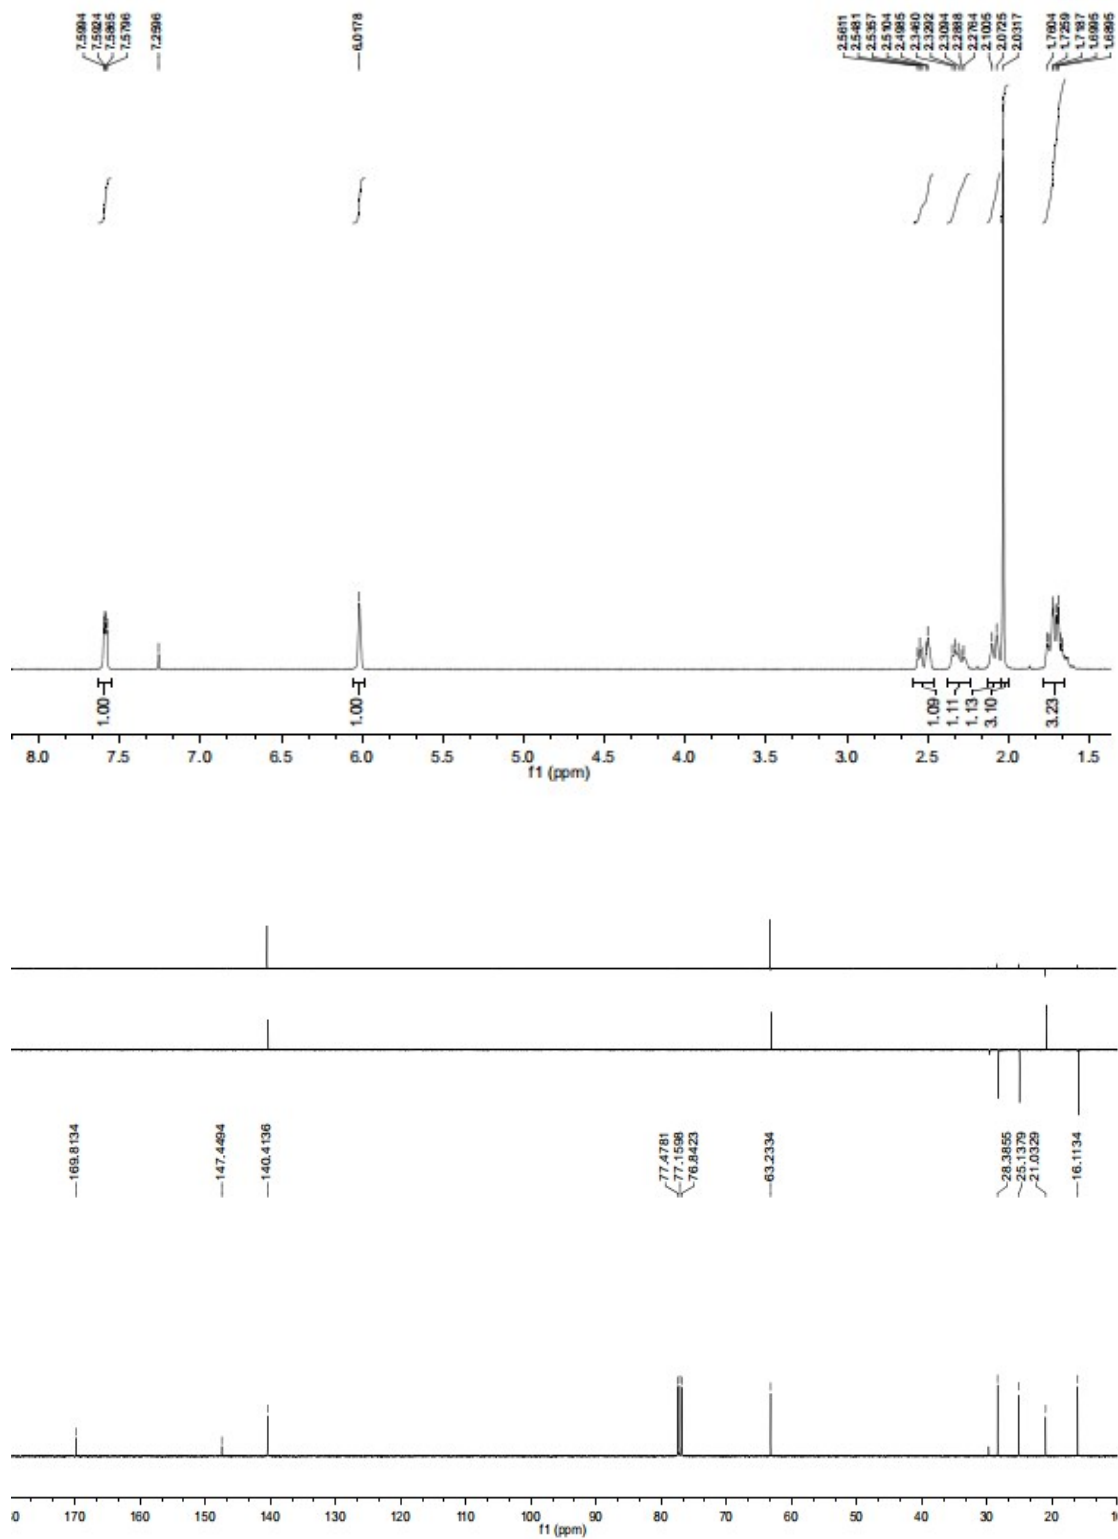



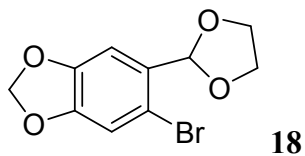

$^1\text{H}$  NMR ( $\text{CDCl}_3$ , 300 MHz),  $^{13}\text{C}$  NMR ( $\text{CDCl}_3$ , 75 MHz)

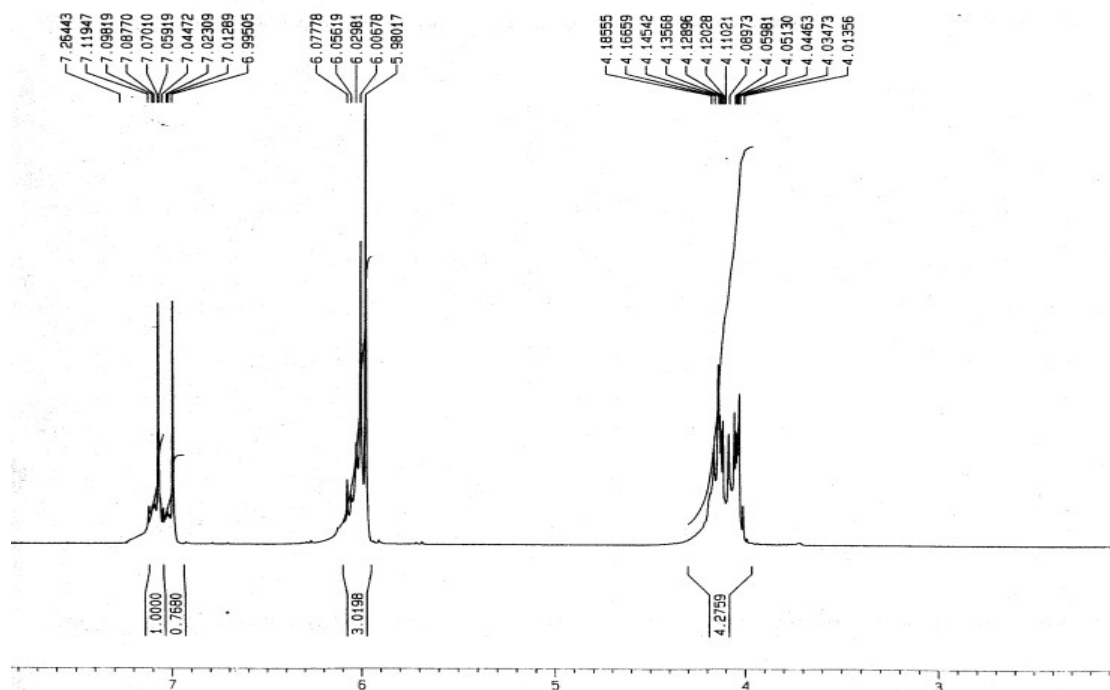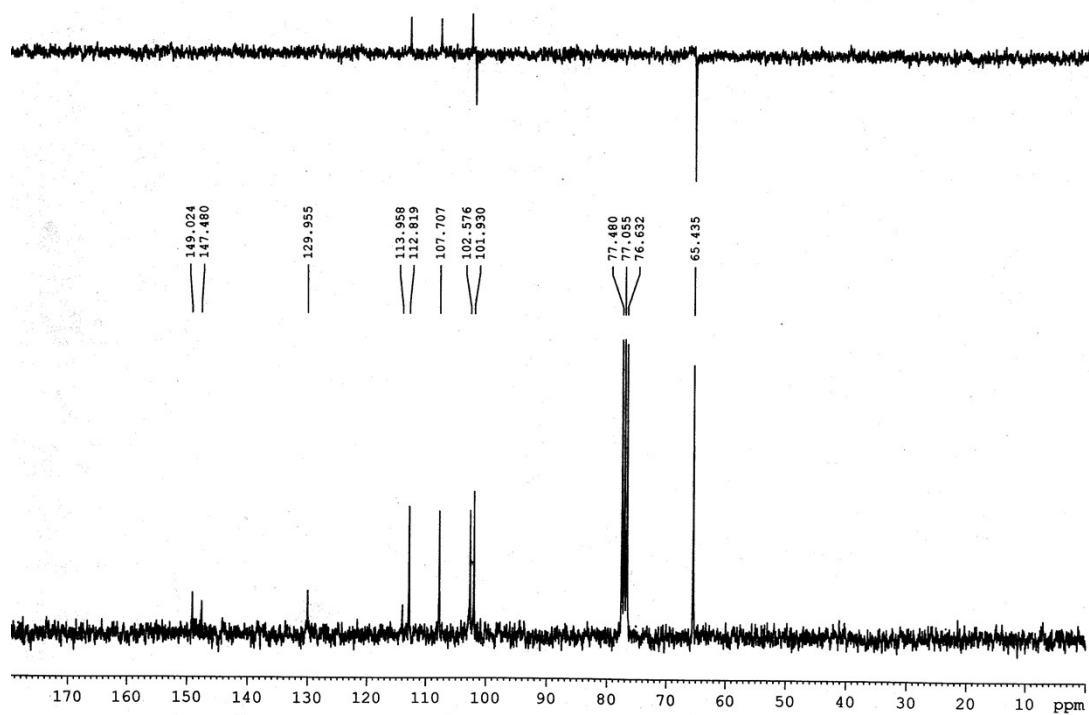

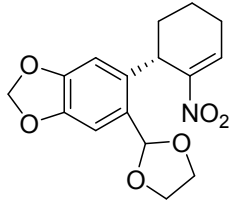

17

$^1\text{H}$  NMR ( $\text{CDCl}_3$ , 300 MHz),  $^{13}\text{C}$  NMR ( $\text{CDCl}_3$ , 75 MHz)

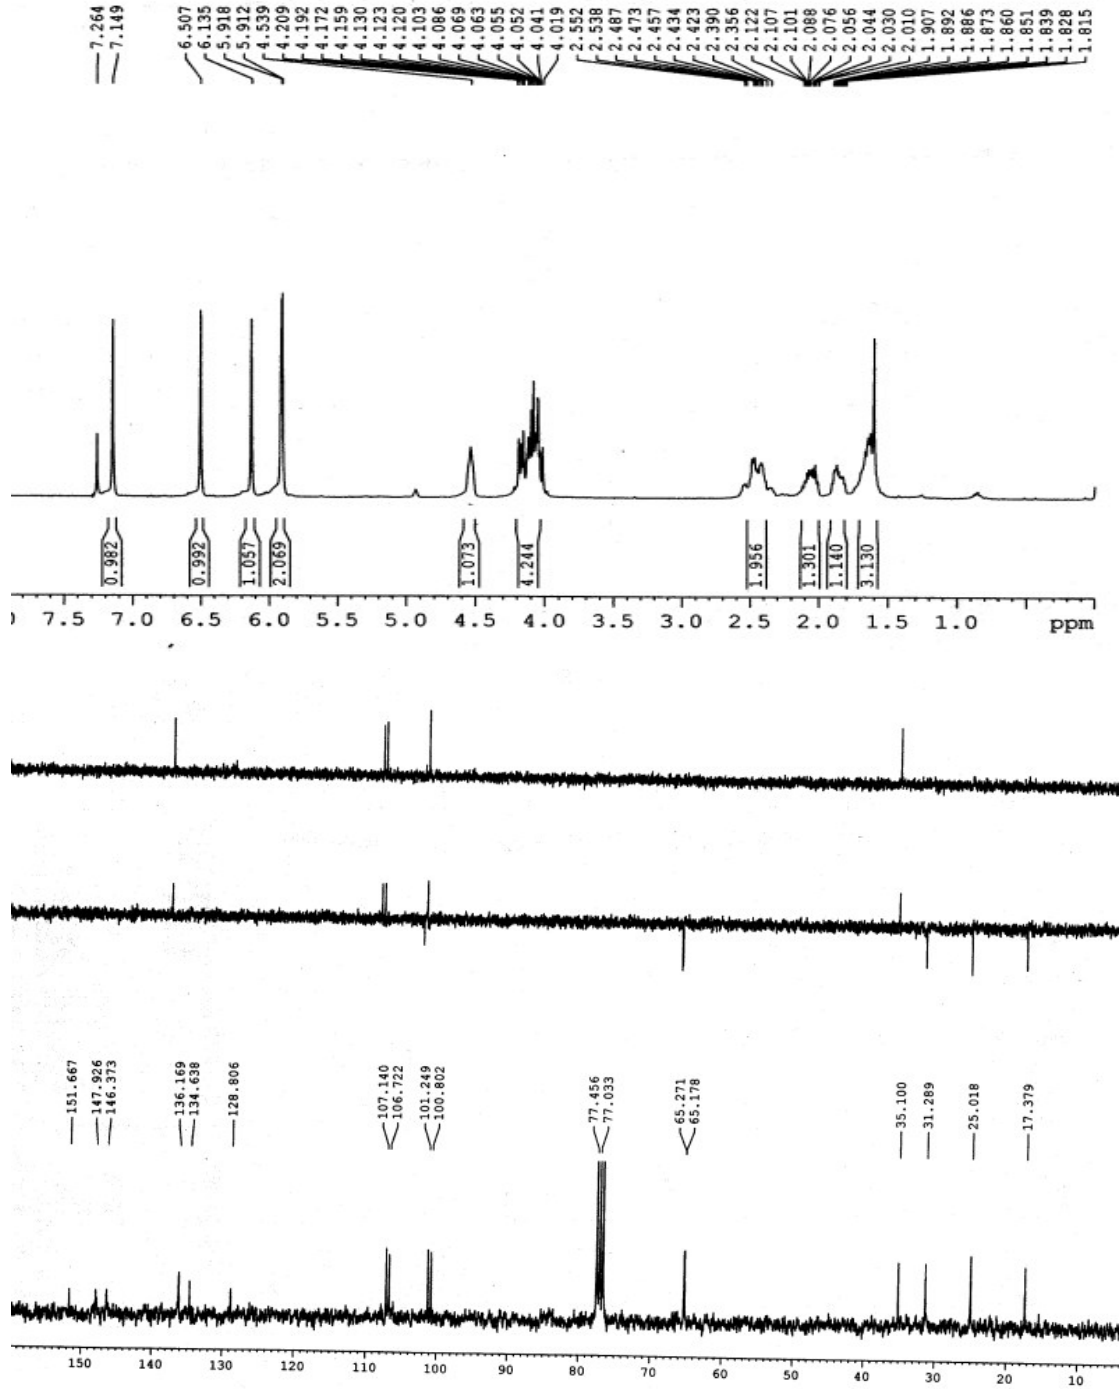

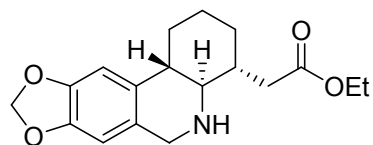

26

$^1\text{H}$  NMR ( $\text{CDCl}_3$ , 300 MHz),  $^{13}\text{C}$  NMR ( $\text{CDCl}_3$ , 75 MHz)

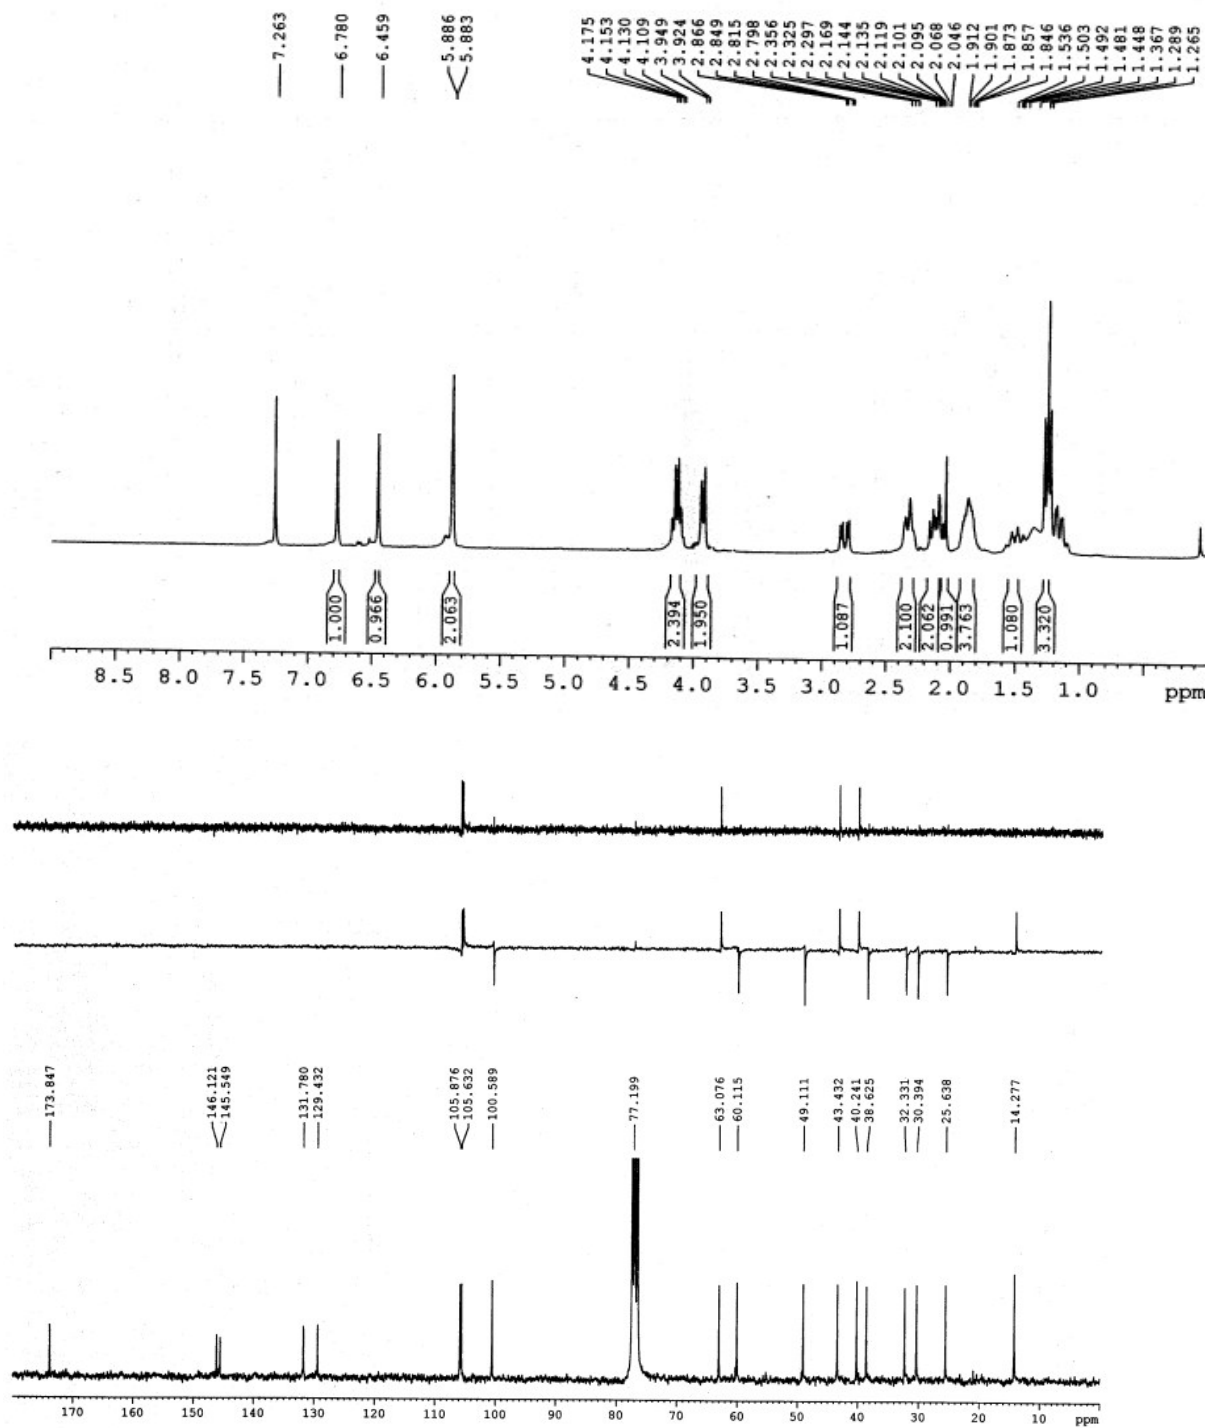

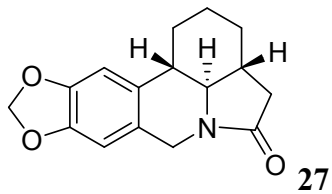

$^1\text{H}$  NMR ( $\text{CDCl}_3$ , 600 MHz),  $^{13}\text{C}$  NMR ( $\text{CDCl}_3$ , 150 MHz)

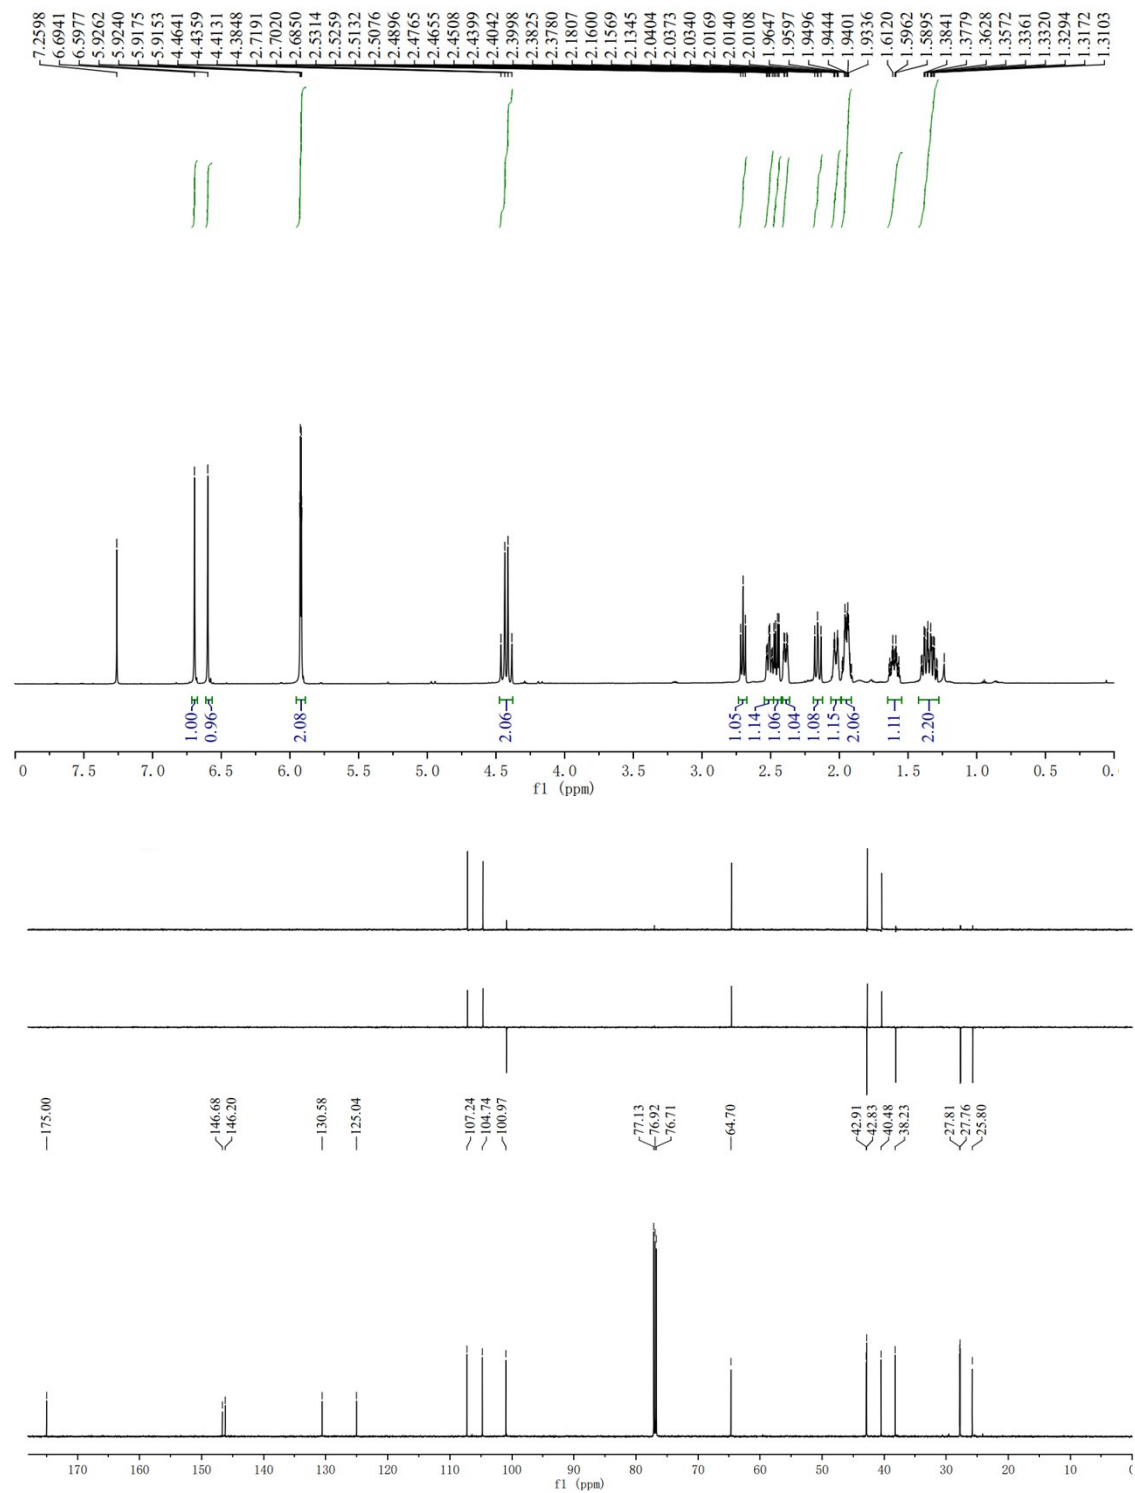

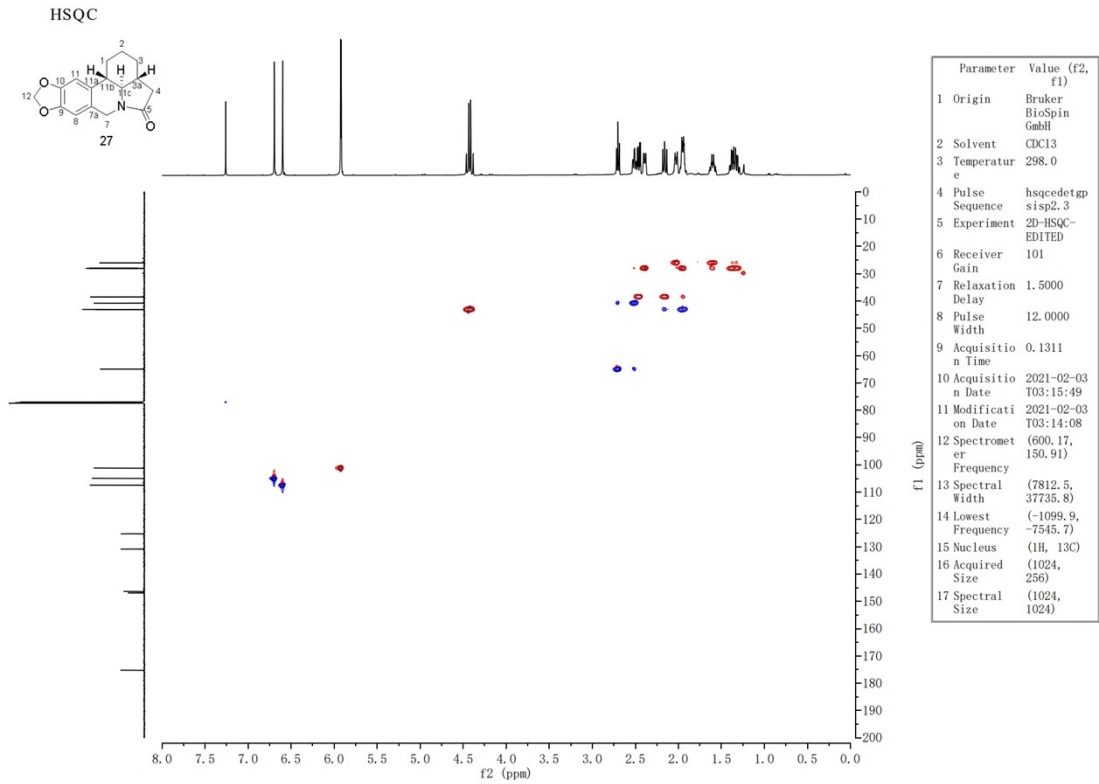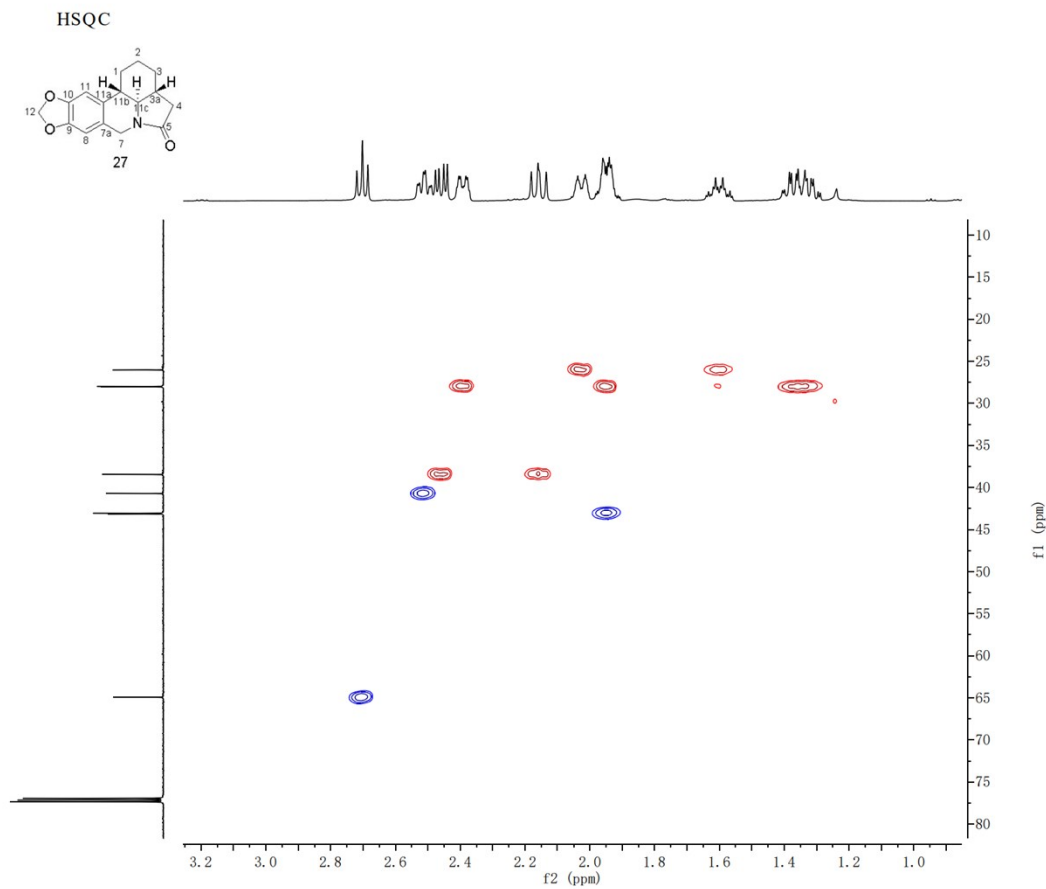

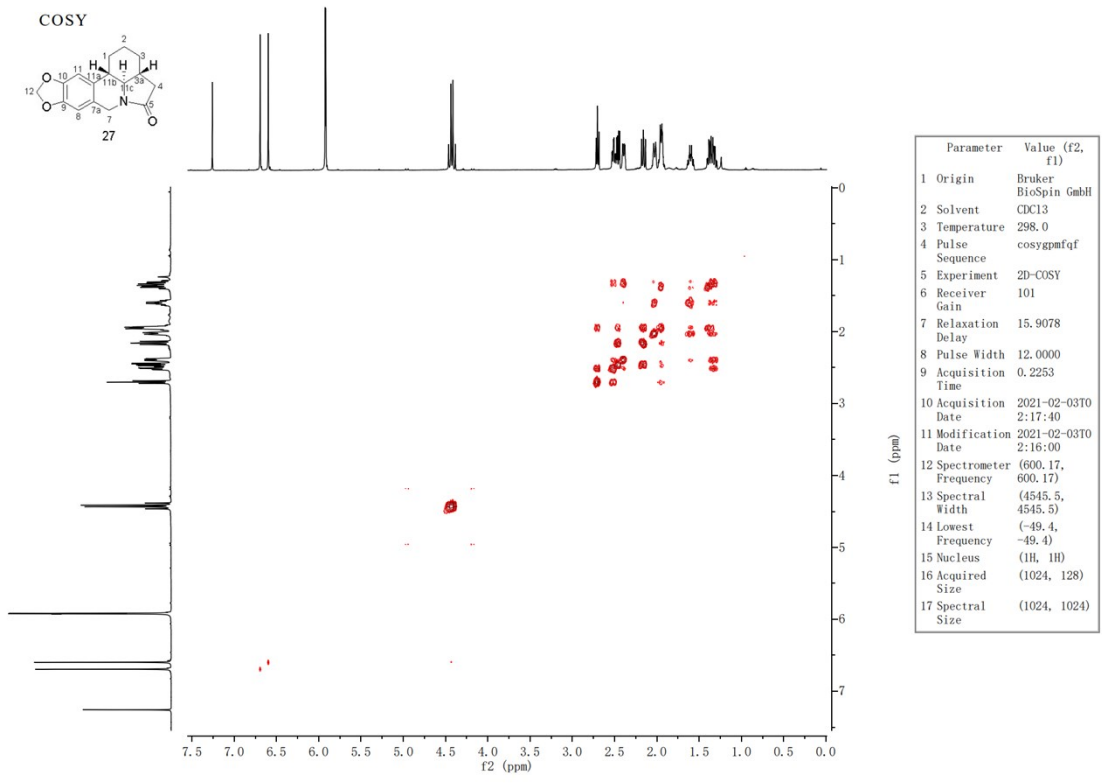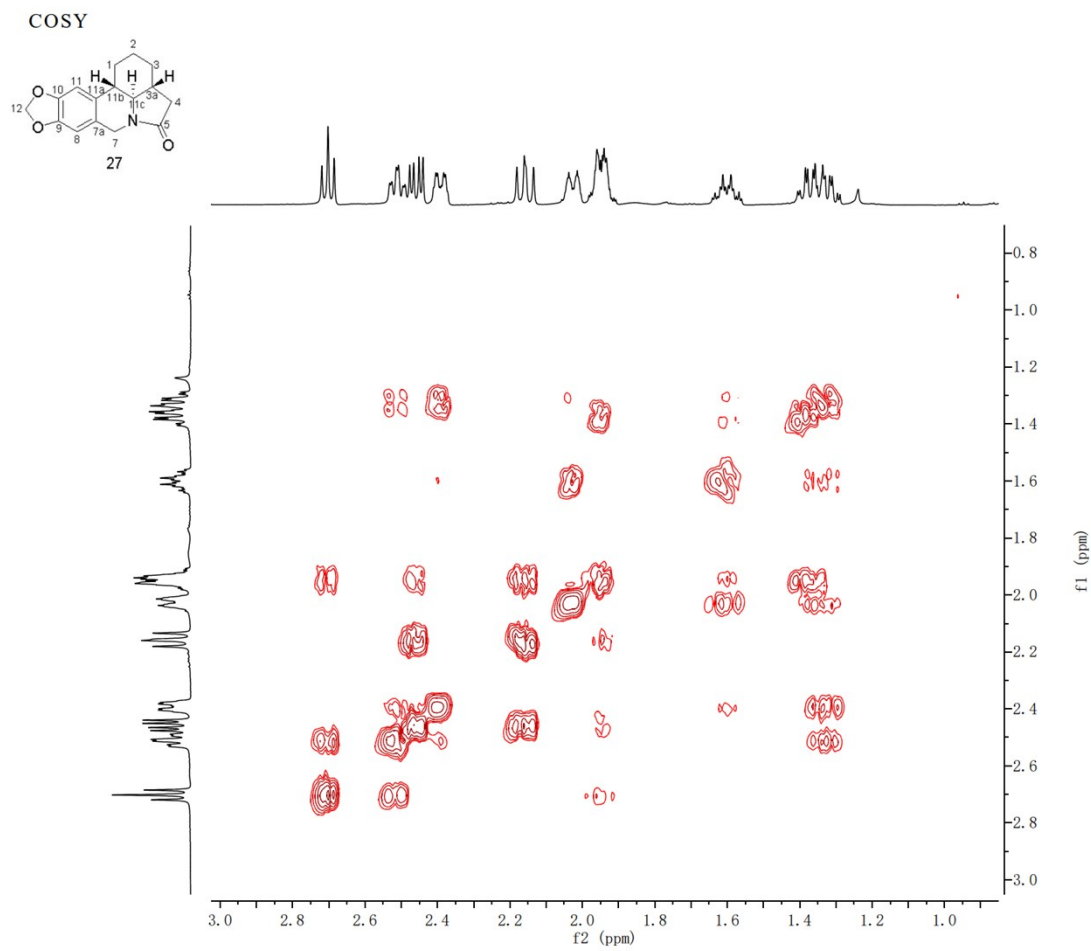

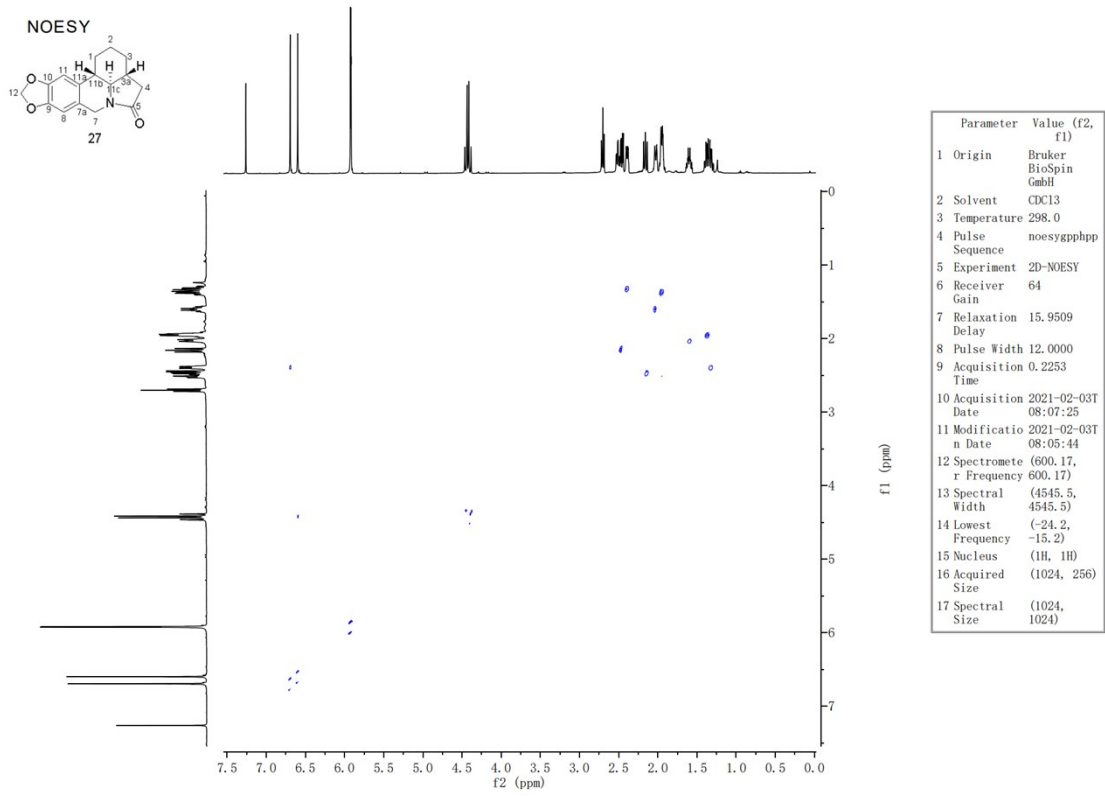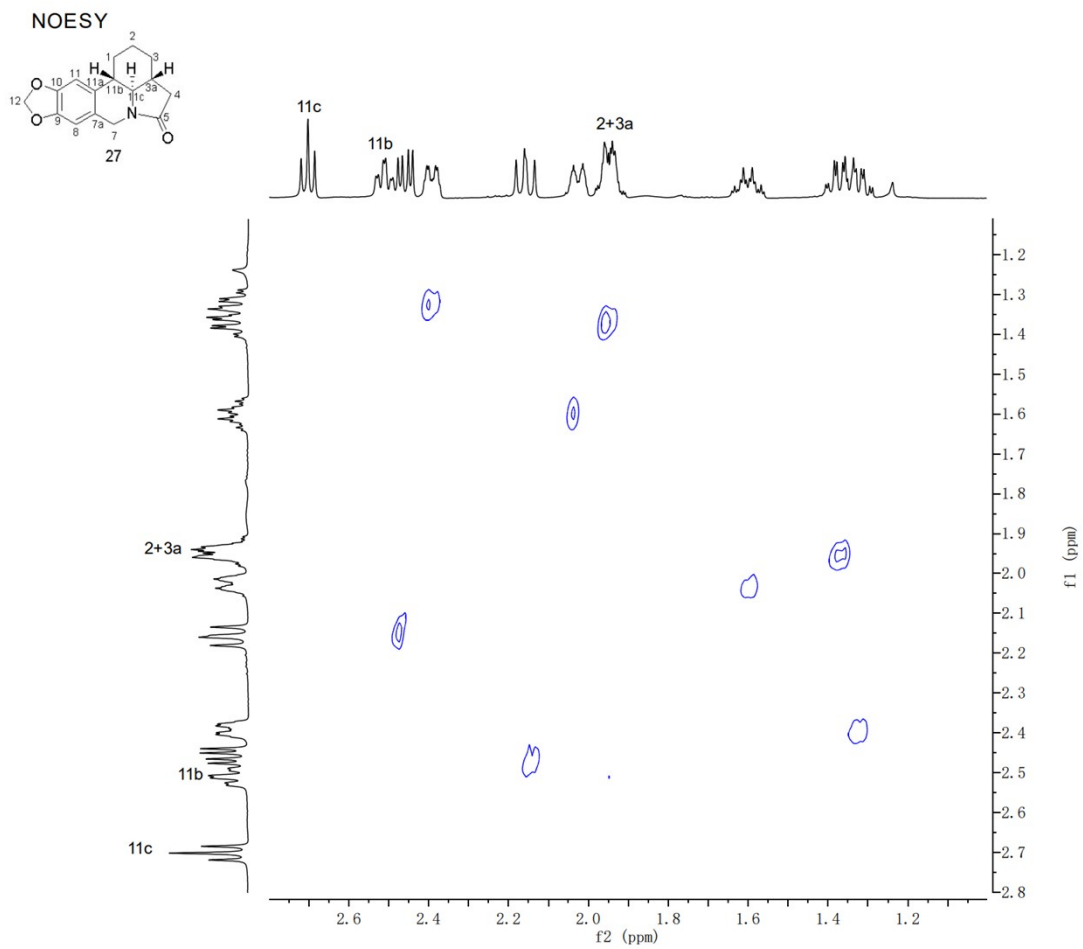

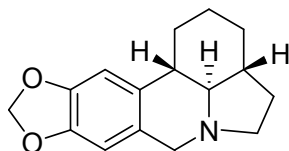

**$\beta$ -Lycorine**

$^1\text{H}$  NMR ( $\text{CDCl}_3$ , 300 MHz),  $^{13}\text{C}$  NMR ( $\text{CDCl}_3$ , 75 MHz)

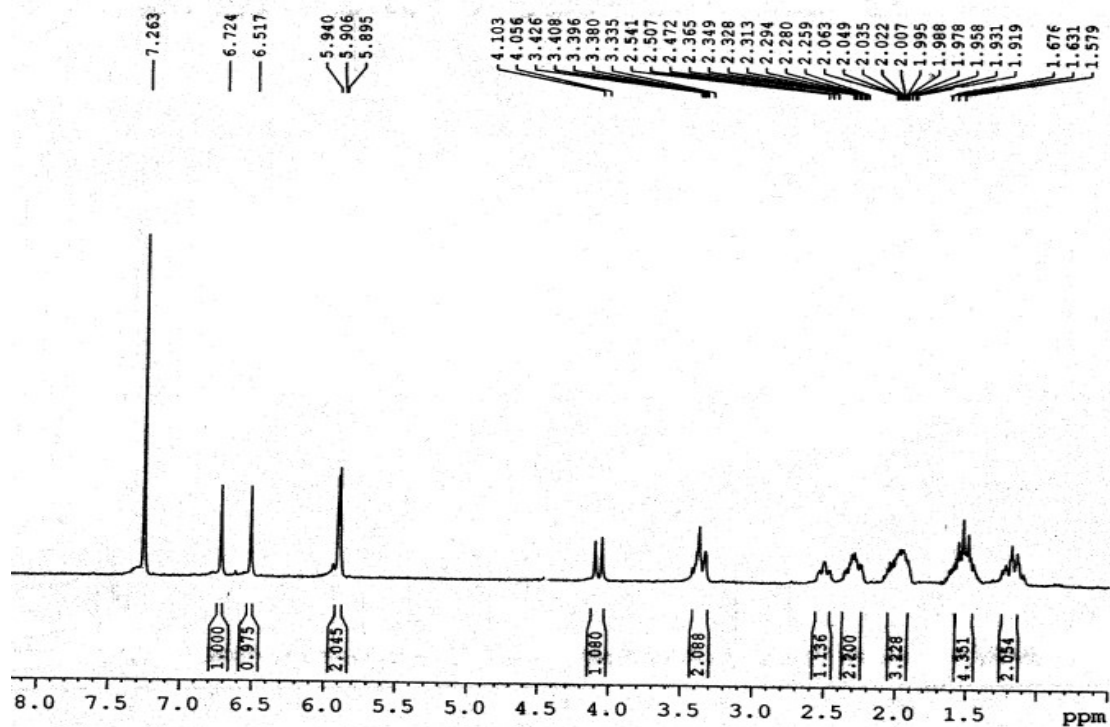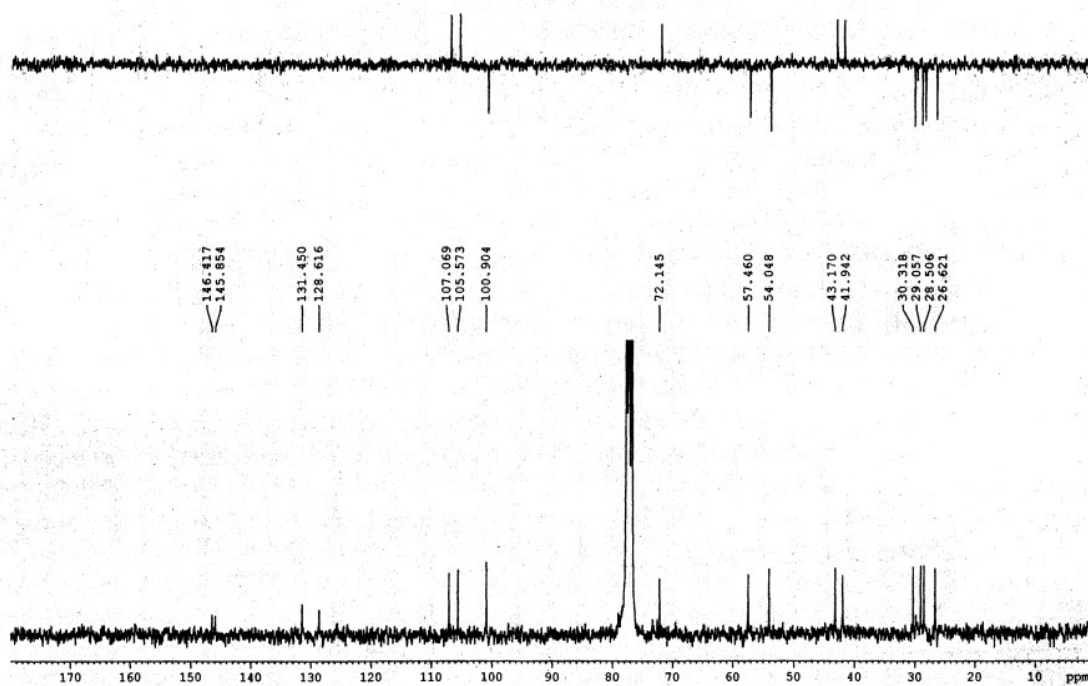

Supplement: d0ob02398a1.pdf [file d0ob02398a1.pdf]
